# Supplementary material for: Defining and analyzing the frequency and severity of flood events to improve risk management from a reinsurance standpoint
Source: Copernicus journal article supplement (doi:10.5194/hess-22-3761-2018), 2018-07-16
Supplement: Supplementary file [file hess-22-3761-2018-supplement-title-page.pdf › hess-22-3761-2018-supplement-title-page.pdf]

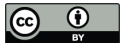

## *Supplement of*

# **Defining and analyzing the frequency and severity of flood events to improve risk management from a reinsurance standpoint**

**Elliott P. Morrill and Joseph F. Becker**

*Correspondence to:* Elliott P. Morrill ([elliott.morrill@guycarp.com](mailto:elliott.morrill@guycarp.com)) and Joseph F. Becker ([joseph.f.becker@guycarp.com](mailto:joseph.f.becker@guycarp.com))

- [hess-22-3761-2018-supplement-title-page.pdf](#)
- Code for Submission
  - All\_USGS\_Analysis.R
  - All\_USGS\_Analysis\_HUC6.R
  - All\_USGS\_Analysis\_Plots.R
  - All\_USGS\_Download\_Main.R
  - All\_USGS\_IndividualAnalysis.R
  - All\_USGS\_IndividualAnalysis\_HUC6.R
  - Independence\_FunctionNCDC.R
  - Independence\_Function\_1.R
  - NCDC\_Analysis.R
  - Plotting\_Script.R
  - Severity.R

The copyright of individual parts of the supplement might differ from the CC BY 3.0 License.
